# Supplementary material
Source: HighWire-hosted journal article supplement (http://molpharm.aspetjournals.org/highwire/filestream/76993/field_highwire_adjunct_files/5/supplemental_Fig2.pdf)
Supplement: supplemental_Fig2.pdf [file supplemental_Fig2.pdf]

**Transcriptome analysis and in vivo activiy of Fluvastatin versus Zoledronic acid in a murine breast cancer metastasis model.**

Nadejda Vintonenko, Jean-Philippe Jais, Nadim Kassis , Mohamed Abdelkarim, Gerard-Yves Perret, Marc Lecouvey , Michel Crepin , Mélanie Di Benedetto

**Molecular pharmacol**

**Supplemental Figure S2**

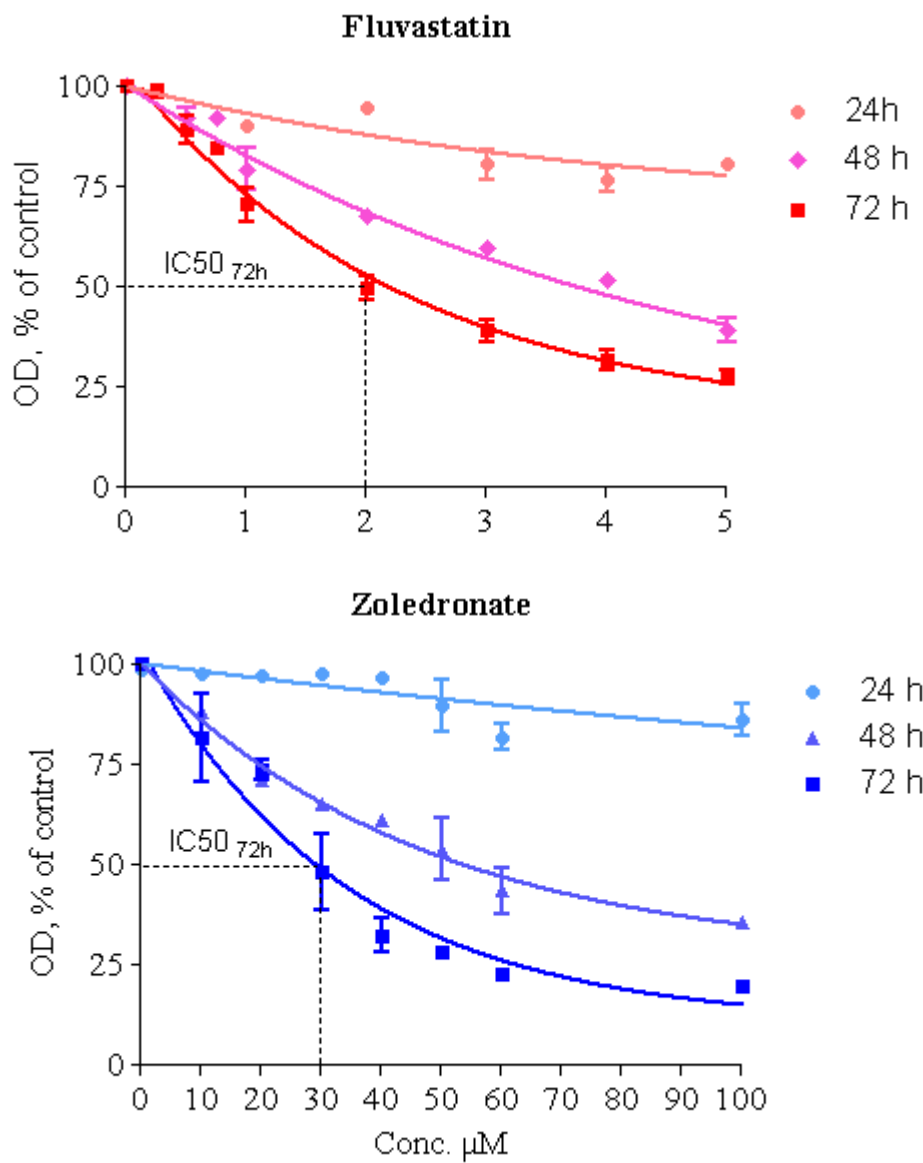

**Supplemental Fig S2. In vitro viability inhibition assay (MTT test)**

MDA-MB-231 cells (5000 cells per well in 96 well plate) were treated with Fluva or Zol at increasing concentrations for 24h, 48h, and 72 h. Control cells were treated with PBS. Then, the cells were washed and incubated with 0.1 mL of MTT (2 mg/mL) for 4 h. Optical density was measured at 570 nm using a Labsystems Multiskan MS microplate reader. Data represents the mean value ( $\pm$ SEM) of three independent experiments.
